# Supplementary material for: Sponsorship Bias in Clinical Trials in the Dental Application of Probiotics: A Meta-Epidemiological Study
Source: MDPI journal article supplement (doi:10.3390/nu14163409), 2022-08-19
Supplement: s1 [file s1]

# Supplementary materials

**Table S1.** Search strategy.

|                                                                                                                                                       |                                                                                                                                                                                                                                                                                                                                                                                                                                                                                                                                                                                                                                                                                                                                                                                                                                                                                                                                                                                                                                                                                                                            |
|-------------------------------------------------------------------------------------------------------------------------------------------------------|----------------------------------------------------------------------------------------------------------------------------------------------------------------------------------------------------------------------------------------------------------------------------------------------------------------------------------------------------------------------------------------------------------------------------------------------------------------------------------------------------------------------------------------------------------------------------------------------------------------------------------------------------------------------------------------------------------------------------------------------------------------------------------------------------------------------------------------------------------------------------------------------------------------------------------------------------------------------------------------------------------------------------------------------------------------------------------------------------------------------------|
| <b>Ovid MEDLINE(R) and Epub Ahead of Print, In-Process, In-Data-Review &amp; Other Non-Indexed Citations and Daily &lt;1946 to April 07, 2022&gt;</b> | <p>1 (systematic review* or meta-analys*).mp. [mp=title, abstract, original title, name of substance word, subject heading word, floating sub-heading word, keyword heading word, organism supplementary concept word, protocol supplementary concept word, rare disease supplementary concept word, unique identifier, synonyms] 397176</p> <p>2 (dent* or tooth or teeth or orthodon* or oral surg* or endodon* or periodon* or prosthodon* or pedodon*).mp. [mp=title, abstract, original title, name of substance word, subject heading word, floating sub-heading word, keyword heading word, organism supplementary concept word, protocol supplementary concept word, rare disease supplementary concept word, unique identifier, synonyms] 757996</p> <p>3 probiotic*.mp. [mp=title, abstract, original title, name of substance word, subject heading word, floating sub-heading word, keyword heading word, organism supplementary concept word, protocol supplementary concept word, rare disease supplementary concept word, unique identifier, synonyms] 35848</p> <p>4 1 and 2 11345</p> <p>5 3 and 4 56</p> |
| <b>mbase &lt;1974 to 2022 April 07&gt;</b>                                                                                                            | <p>1 (systematic review* or meta-analys*).mp. [mp=title, abstract, heading word, drug trade name, original title, device manufacturer, drug manufacturer, device trade name, keyword heading word, floating subheading word, candidate term word] 609442</p> <p>2 (dent* or tooth or teeth or orthodon* or oral surg* or endodon* or periodon* or prosthodon* or pedodon*).mp. [mp=title, abstract, heading word, drug trade name, original title, device manufacturer, drug manufacturer, device trade name, keyword heading word, floating subheading word, candidate term word] 714889</p> <p>3 probiotic*.mp. [mp=title, abstract, heading word, drug trade name, original title, device manufacturer, drug manufacturer, device trade name, keyword heading word, floating subheading word, candidate term word] 53140</p> <p>4 1 and 2 13267</p> <p>5 3 and 4 98</p>                                                                                                                                                                                                                                                 |
| <b>ISI Web of Science 131</b>                                                                                                                         | <p>All fields=systematic review* OR meta-analys*</p> <p>And All fields=dent* or tooth or teeth or orthodon* or oral surg* or endodon* or periodon* or prosthodon* or pedodon*</p> <p>And All fields=probiotic*</p>                                                                                                                                                                                                                                                                                                                                                                                                                                                                                                                                                                                                                                                                                                                                                                                                                                                                                                         |
| <b>OPENGREY 0</b>                                                                                                                                     | <p>(dent* OR tooth OR teeth OR orthodon* OR "oral surg*" OR endodon* OR periodon* OR prosthodon* OR pedodon*) AND ("systematic review*" OR meta-analys*) AND (probiotic*)</p>                                                                                                                                                                                                                                                                                                                                                                                                                                                                                                                                                                                                                                                                                                                                                                                                                                                                                                                                              |
| <b>Sum: 202 out of 285 publications left after removing the duplicates</b>                                                                            |                                                                                                                                                                                                                                                                                                                                                                                                                                                                                                                                                                                                                                                                                                                                                                                                                                                                                                                                                                                                                                                                                                                            |

**Table S2.** Quality assessment.

| trial                 | sponsorship | random | allocation | blinding1 | blinding2 | incomplete | selective |
|-----------------------|-------------|--------|------------|-----------|-----------|------------|-----------|
| Alkaya 2016           | 0           | 0      | 0          | 0         | 0         | 0          | 0         |
| Alshareef 2020        | 1           | 2      | 1          | 2         | 2         | 0          | 2         |
| Ashwin 2015           | 1           | 0      | 0          | 0         | 0         | 0          | 1         |
| Chandra 2016          | 1           | 0      | 1          | 0         | 0         | 0          | 1         |
| Costacurta 2018       | 1           | 1      | 1          | 1         | 1         | 0          | 0         |
| Dhaliwal 2017         | 0           | 0      | 1          | 0         | 0         | 0          | 0         |
| Dugourd 2020          | 1           | 0      | 0          | 1         | 1         | 0          | 0         |
| Elsadek 2020          | 0           | 1      | 1          | 0         | 0         | 0          | 1         |
| Fawaz 2019            | 1           | 0      | 0          | 0         | 0         | 0          | 1         |
| Flichy-Fernández 2015 | 1           | 0      | 0          | 0         | 0         | 0          | 0         |
| Galofré 2018          | 0           | 0      | 0          | 0         | 0         | 0          | 0         |
| Ghasemi 2017          | 1           | 1      | 1          | 0         | 1         | 0          | 0         |
| Ghasemipour 2014      | 0           | 1      | 1          | 1         | 1         | 0          | 1         |
| Hardar 2016           | 1           | 0      | 0          | 0         | 1         | 1          | 1         |
| Ince 2015             | 0           | 0      | 0          | 0         | 0         | 0          | 0         |
| Iniesta 2012          | 1           | 2      | 1          | 0         | 0         | 0          | 0         |
| Invernici 2018        | 0           | 0      | 0          | 0         | 0         | 0          | 0         |
| Iwasakia 2016         | 1           | 1      | 1          | 0         | 1         | 0          | 0         |
| Jagadeesh 2017        | 1           | 2      | 0          | 0         | 0         | 0          | 0         |
| Javid 2020            | 0           | 1      | 1          | 0         | 0         | 0          | 1         |
| Keller 2012           | 1           | 2      | 0          | 0         | 0         | 0          | 0         |
| Kuru 2017             | 0           | 0      | 0          | 0         | 0         | 0          | 0         |
| Laleman 2015          | 1           | 0      | 0          | 0         | 0         | 0          | 0         |
| Mani 2017             | 0           | 1      | 1          | 0         | 1         | 0          | 0         |
| Marta 2019            | 0           | 0      | 0          | 0         | 0         | 0          | 0         |
| Meenakshi 2018        | 1           | 2      | 0          | 1         | 2         | 0          | 2         |
| Mimura 2017           | 1           | 0      | 0          | 1         | 1         | 1          | 0         |
| Montero 2017          | 0           | 0      | 1          | 0         | 0         | 0          | 0         |
| Morales 2016          | 0           | 0      | 0          | 0         | 0         | 1          | 0         |

|                      |   |   |   |   |   |   |   |
|----------------------|---|---|---|---|---|---|---|
| Morales 2018         | 0 | 0 | 0 | 0 | 0 | 0 | 0 |
| Nagarajappa 2015     | 1 | 1 | 2 | 0 | 1 | 0 | 1 |
| Nozari 2015          | 0 | 1 | 1 | 0 | 1 | 0 | 1 |
| Pedersen 2019        | 0 | 1 | 0 | 1 | 1 | 1 | 0 |
| Pelekos 2019         | 0 | 0 | 0 | 0 | 0 | 0 | 0 |
| Pena 2018            | 1 | 0 | 0 | 0 | 0 | 0 | 0 |
| Penala 2016          | 0 | 0 | 0 | 0 | 0 | 1 | 0 |
| Pinto 2014           | 1 | 0 | 2 | 2 | 0 | 2 | 0 |
| Sajedinejad 2018     | 0 | 0 | 0 | 0 | 0 | 1 | 1 |
| Srivastava 2016      | 1 | 0 | 0 | 1 | 0 | 0 | 1 |
| Staab 2009           | 1 | 0 | 1 | 2 | 2 | 0 | 0 |
| Stecksen-Blicks 2009 | 0 | 0 | 0 | 0 | 0 | 2 | 1 |
| Suzuki 2014          | 0 | 0 | 0 | 0 | 0 | 1 | 1 |
| Teanpaisan 2013      | 0 | 0 | 0 | 0 | 0 | 0 | 1 |
| Tekce 2015           | 0 | 0 | 0 | 0 | 0 | 0 | 0 |
| Teughels 2013        | 0 | 0 | 0 | 0 | 0 | 0 | 0 |
| Toiviainen 2015      | 0 | 2 | 0 | 0 | 0 | 0 | 0 |
| Vivekananda 2010     | 1 | 0 | 0 | 0 | 0 | 0 | 0 |
| Yadav 2014           | 1 | 1 | 0 | 0 | 1 | 0 | 1 |

---

0=low 1=n=unclear 2=high
